# Supplementary material for: Efficient and stable near-infrared Y2Mg2Al2Si2O12:Cr3+ phosphor: analysis of the luminescence source by a site elimination strategy
Source: Royal Society of Chemistry journal article supplement (doi:10.1039/d3tc04245f), 2024-01-01
Supplement: d3tc04245f1.pdf [file d3tc04245f1.pdf]

## Electronic supplementary information

# Efficient and stable near-infrared $\text{Y}_2\text{Mg}_2\text{Al}_2\text{Si}_2\text{O}_{12}:\text{Cr}^{3+}$ phosphor: analysis of luminescence source by site elimination strategy

Yixin Sun,<sup>a</sup> Mengmeng Shang,<sup>\*a</sup> Yining Wang,<sup>a</sup> Yiying Zhu,<sup>a</sup> Xiaole Xing,<sup>a</sup> Peipei Dang,<sup>b</sup> and Jun Lin<sup>\*b</sup>

<sup>a</sup> Key Laboratory for Liquid-Solid Structural Evolution and Processing of Materials Ministry of Education, School of Material Science and Engineering, Shandong University, 17923 Jingshi Road, Jinan 250061, P. R. China. E-mail: mmshang@sdu.edu.cn

<sup>b</sup> State Key Laboratory of Rare Earth Resource Utilization, Changchun Institute of Applied Chemistry, Chinese Academy of Sciences, Changchun 130022, P. R. China. E-mail: jlin@ciac.ac.cn

**Table S1** The calculated average lifetime of YMAS:xCr<sup>3+</sup> (x = 1% ~ 22%) monitored at the optimal monitoring wavelength by excitation by 430 nm.

| Cr <sup>3+</sup><br>concentration | $\tau^*$ ( $\mu$ s) | A <sub>1</sub> | $\tau_1$ ( $\mu$ s) | A <sub>2</sub> | $\tau_2$ ( $\mu$ s) | optimal monitoring<br>wavelength (nm) |
|-----------------------------------|---------------------|----------------|---------------------|----------------|---------------------|---------------------------------------|
| 1%                                | 163.1               | 1704           | 234.42              | 4468           | 65.14               | 715                                   |
| 2%                                | 147.6               | 1867           | 209.18              | 4542           | 61.18               | 745                                   |
| 6%                                | 106.5               | 1961           | 151.83              | 4773           | 49.79               | 755                                   |
| 10%                               | 80.2                | 1510           | 126.22              | 5596           | 46.48               | 770                                   |
| 14%                               | 65.0                | 574            | 138.13              | 6514           | 45.29               | 785                                   |
| 18%                               | 53.5                | 482            | 120.68              | 6827           | 38.70               | 792                                   |
| 22%                               | 45.8                | 503            | 103.76              | 7339           | 33.45               | 810                                   |

**Table S2** The content of each element in YMA<sub>4</sub>S:2%Cr<sup>3+</sup>.

| Element | Original solution<br>element concentration<br>C <sub>I</sub> (mg/L) | Test solution element<br>Concentration C <sub>0</sub><br>(mg/L) | dilution<br>multiple (f) | element<br>content W<br>(%) |
|---------|---------------------------------------------------------------------|-----------------------------------------------------------------|--------------------------|-----------------------------|
| Y       | 647.469                                                             | 6.475                                                           | 100                      | 34.08                       |
| Mg      | 77.914                                                              | 77.791                                                          | 10                       | 4.10                        |
| Al      | 327.086                                                             | 3.271                                                           | 100                      | 17.22                       |
| Si      | 102.700                                                             | 1.027                                                           | 100                      | 5.30                        |
| Cr      | 2.9122                                                              | 2.912                                                           | 1.0                      | 0.15                        |

**Table S3** Main parameters of processing and refinement results of  $Y_2Mg_{2-y}Al_{2+2y}Si_{2-y}O_{12}:2\%Cr^{3+}$  ( $y = 0$  and  $1$ ).

| Compound                          | $y = 0$    | $y = 1$     |
|-----------------------------------|------------|-------------|
| $a = b = c, \text{Å}$             | 11.9667(8) | 11.9530(11) |
| $V, \text{Å}^3$                   | 1713.69    | 1707.78     |
| $\alpha = \beta = \gamma, ^\circ$ | 90         | 90          |
| $R_{wp}, \%$                      | 8.96       | 9.53        |
| $R_p, \%$                         | 7.52       | 8.72        |
| $\chi^2$                          | 3.27       | 3.09        |

**Table S4** Final refined atomic coordinates, occupancy and  $B_{eq}$  for  $Y_2Mg_{2-y}Al_{2+2y}Si_{2-y}O_{12}:2\%Cr^{3+}$  ( $y = 0$  and  $1$ ).

| $Y_2Mg_{2-y}Al_{2+2y}Si_{2-y}O_{12}:2\%Cr^{3+}$ ( $y = 0$ ) |       |             |             |             |           |           |
|-------------------------------------------------------------|-------|-------------|-------------|-------------|-----------|-----------|
| Atom                                                        | Mult. | x           | y           | z           | Occ.      | $B_{eq}$  |
| Al1                                                         | 16a   | 0.000000(0) | 0.000000(0) | 0.000000(0) | 0.4720(2) | 0.0181(7) |
| Mg1                                                         | 16a   | 0.000000(0) | 0.000000(0) | 0.000000(0) | 0.5077(2) | 0.0181(7) |
| Cr1                                                         | 16a   | 0.000000(0) | 0.000000(0) | 0.000000(0) | 0.0203(2) | 0.0181(7) |
| Al2                                                         | 24d   | 0.250000(0) | 0.375000(0) | 0.000000(0) | 0.2876(2) | 0.0209(4) |
| Si1                                                         | 24d   | 0.250000(0) | 0.375000(0) | 0.000000(0) | 0.6970(2) | 0.0209(4) |
| Cr2                                                         | 24d   | 0.250000(0) | 0.375000(0) | 0.000000(0) | 0.0154(2) | 0.0209(4) |
| Y1                                                          | 24c   | 0.250000(0) | 0.125000(0) | 0.000000(0) | 0.7316(2) | 0.0097(9) |
| Mg2                                                         | 24c   | 0.250000(0) | 0.125000(0) | 0.000000(0) | 0.2684(2) | 0.0097(9) |
| O1                                                          | 96h   | 0.035842(5) | 0.054675(7) | 0.656871(4) | 1.0       | 0.0276(6) |

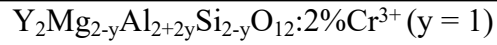

| Atom | Mult. | x           | y           | z           | Occ.      | B <sub>eq</sub> |
|------|-------|-------------|-------------|-------------|-----------|-----------------|
| Al1  | 16a   | 0.000000(0) | 0.000000(0) | 0.000000(0) | 0.9525(3) | 0.0169(3)       |
| Cr1  | 16a   | 0.000000(0) | 0.000000(0) | 0.000000(0) | 0.0475(3) | 0.0169(3)       |
| Al2  | 24d   | 0.250000(0) | 0.375000(0) | 0.000000(0) | 0.6732(4) | 0.0254(1)       |
| Si1  | 24d   | 0.250000(0) | 0.375000(0) | 0.000000(0) | 0.3136(4) | 0.0254(1)       |
| Cr2  | 24d   | 0.250000(0) | 0.375000(0) | 0.000000(0) | 0.0132(4) | 0.0254(1)       |
| Y1   | 24c   | 0.250000(0) | 0.125000(0) | 0.000000(0) | 0.7386(3) | 0.0146(3)       |
| Mg2  | 24c   | 0.250000(0) | 0.125000(0) | 0.000000(0) | 0.2614(3) | 0.0146(3)       |
| O1   | 96h   | 0.030509(2) | 0.054747(1) | 0.651329(4) | 1.0       | 0.0249(1)       |

---

**Table S5** The calculated average lifetime of YMA<sub>4</sub>S:xCr<sup>3+</sup> (x = 2% ~ 15%) monitored at 771 nm.

| Cr <sup>3+</sup><br>concentration | $\tau^*$ ( $\mu$ s) | $A_1$ | $\tau_1$ ( $\mu$ s) | $A_2$  | $\tau_2$ ( $\mu$ s) |
|-----------------------------------|---------------------|-------|---------------------|--------|---------------------|
| 2%                                | 185.1               | 2052  | 240.6               | 3564   | 63.1                |
| 6%                                | 166.6               | 1915  | 225.8               | 3915   | 63.1                |
| 8%                                | 139.5               | 2250  | 183                 | 3799   | 57.4                |
| 10%                               | 132.2               | 1815  | 188.2               | 4400   | 60.9                |
| 12%                               | 118.7               | 1401  | 183.4               | 4725   | 61.8                |
| 15%                               | 96.5                | 1260  | 157.6               | 5236.5 | 33.45               |

**Table S6** The calculated average lifetime of YMA<sub>4</sub>S:xCr<sup>3+</sup> (x = 2% ~ 15%) monitored at 855 nm.

| Cr <sup>3+</sup><br>concentration | $\tau^*$ ( $\mu$ s) | $A_1$ | $\tau_1$ ( $\mu$ s) | $A_2$ | $\tau_2$ ( $\mu$ s) |
|-----------------------------------|---------------------|-------|---------------------|-------|---------------------|
| 2%                                | 122.8               | 1779  | 171.7               | 4347  | 443.1               |
| 6%                                | 122.6               | 1705  | 176.5               | 4503  | 48.9                |
| 8%                                | 116.0               | 1708  | 169.9               | 4785  | 48.1                |
| 10%                               | 108.3               | 1514  | 166.9               | 5099  | 48.7                |
| 12%                               | 97.4                | 1279  | 160.4               | 5450  | 48.4                |
| 15%                               | 95.6                | 1279  | 160.4               | 5876  | 43.45               |

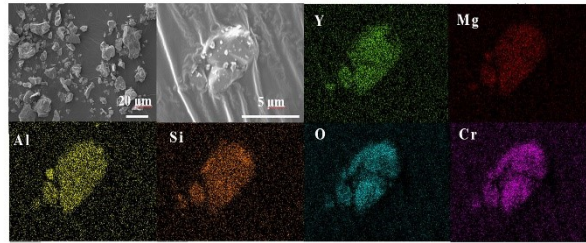

**Fig. S1** SEM image and elemental mapping images of YMAS:2%Cr<sup>3+</sup>.

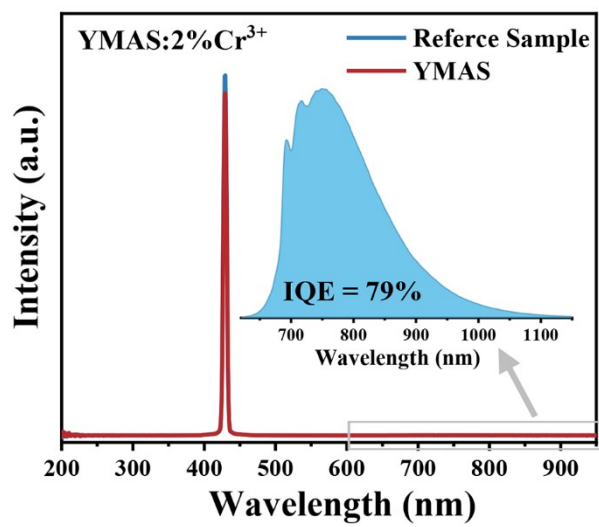

**Fig. S2** The quantum yield diagram of YMAS:2%Cr<sup>3+</sup>.

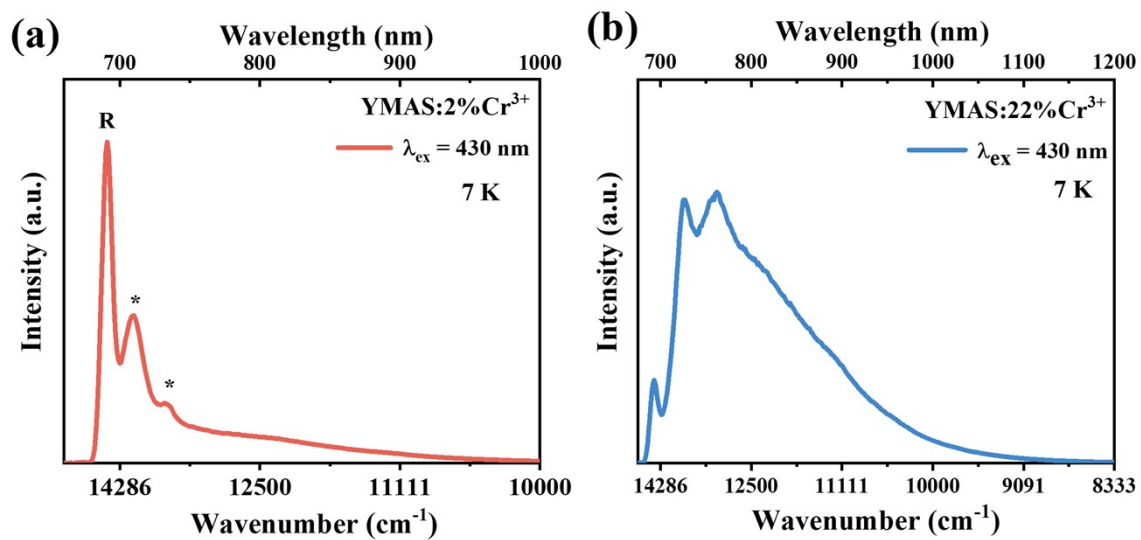

**Fig. S3** The PL spectra of (a) YMAS:2%Cr<sup>3+</sup> and (b) YMAS:22%Cr<sup>3+</sup> for temperatures at 7 K.



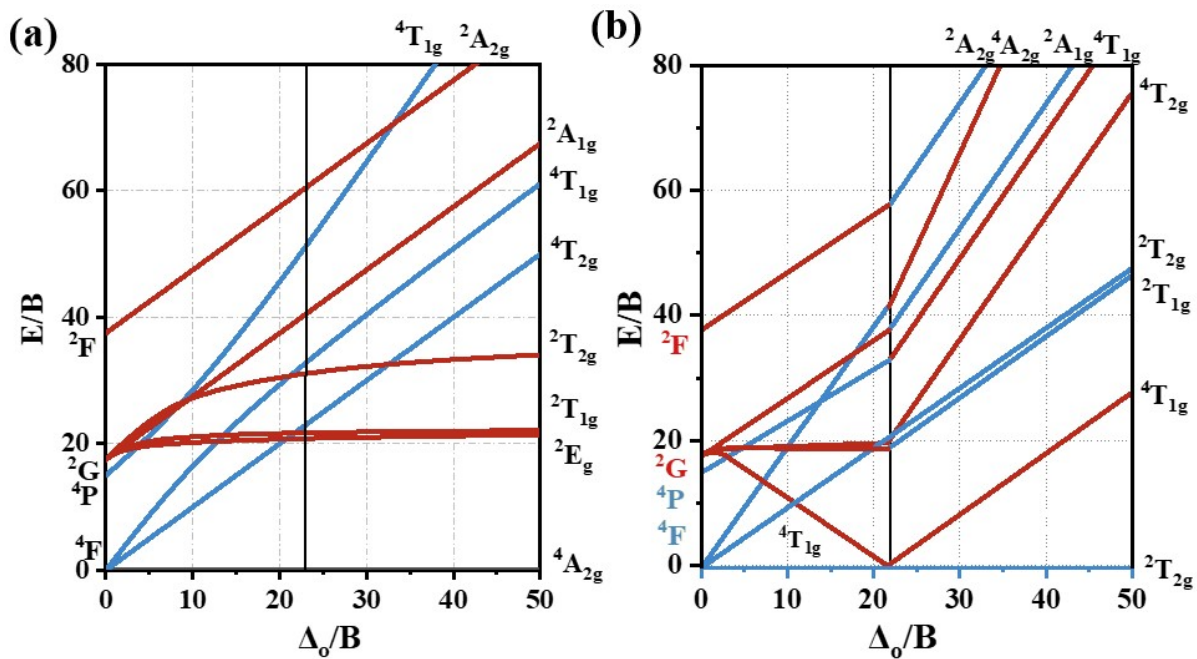

**Fig. S4** Tanabe-Sugano diagram for  $\text{Cr}^{3+}$  ion in (a) octahedral coordination, and (b) tetrahedral coordination.

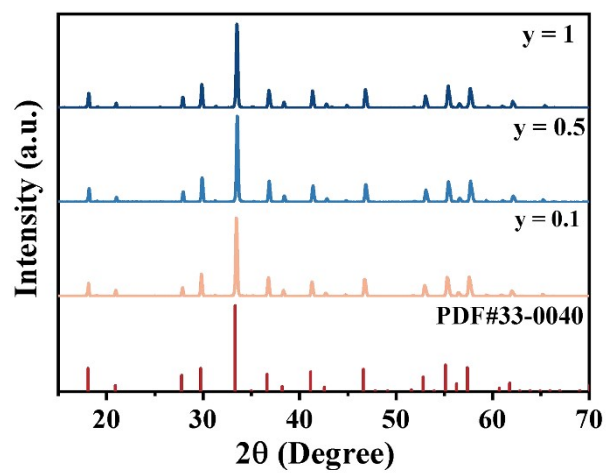

**Fig. S5** XRD patterns of the  $\text{Y}_2\text{Mg}_{2-y}\text{Al}_{2+2y}\text{Si}_{2-y}\text{O}_{12}:2\%\text{Cr}^{3+}$  ( $y = 0.1, 0.5$  and  $1$ ).

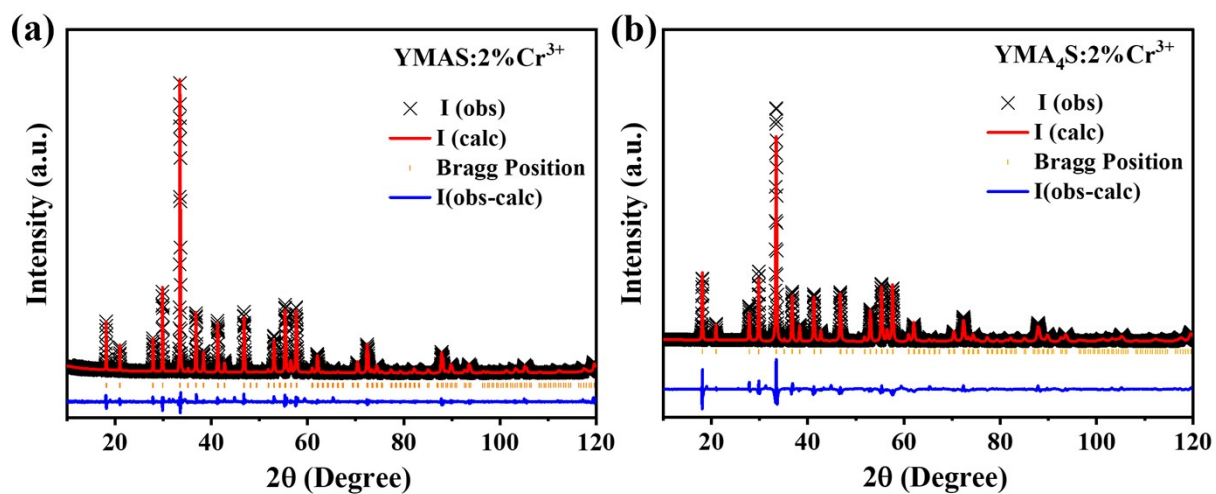

Fig. S6 Rietveld refinement of (a) YMAS:2%Cr<sup>3+</sup> and (b) YMA<sub>4</sub>S:2%Cr<sup>3+</sup>.

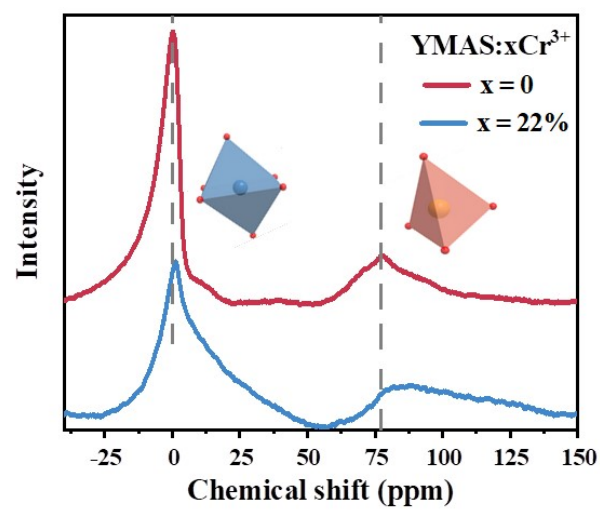

**Fig. S7**  $^{27}\text{Al}$  ss-NMR spectra of YMAS: $x\text{Cr}^{3+}$  ( $x = 0, 22\%$ ).

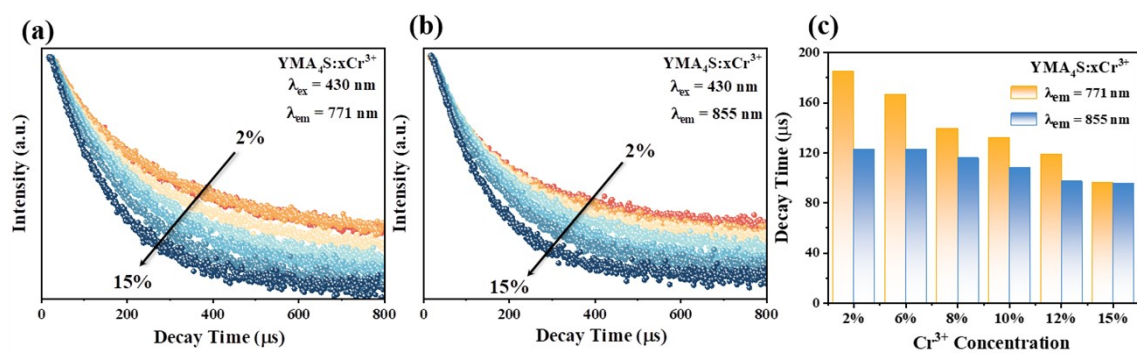

**Fig. S8** Fluorescence decay curves of  $\text{YMA}_4\text{S}:\text{xCr}^{3+}$  ( $x = 2\% \sim 15\%$ ) monitored at (a)  $771 \text{ nm}$  and (b)  $855 \text{ nm}$ . (c) The different decay rates of the Cr1 ( $771 \text{ nm}$ ) and Cr2 ( $855 \text{ nm}$ ) in  $\text{YMA}_4\text{S}:\text{xCr}^{3+}$ .

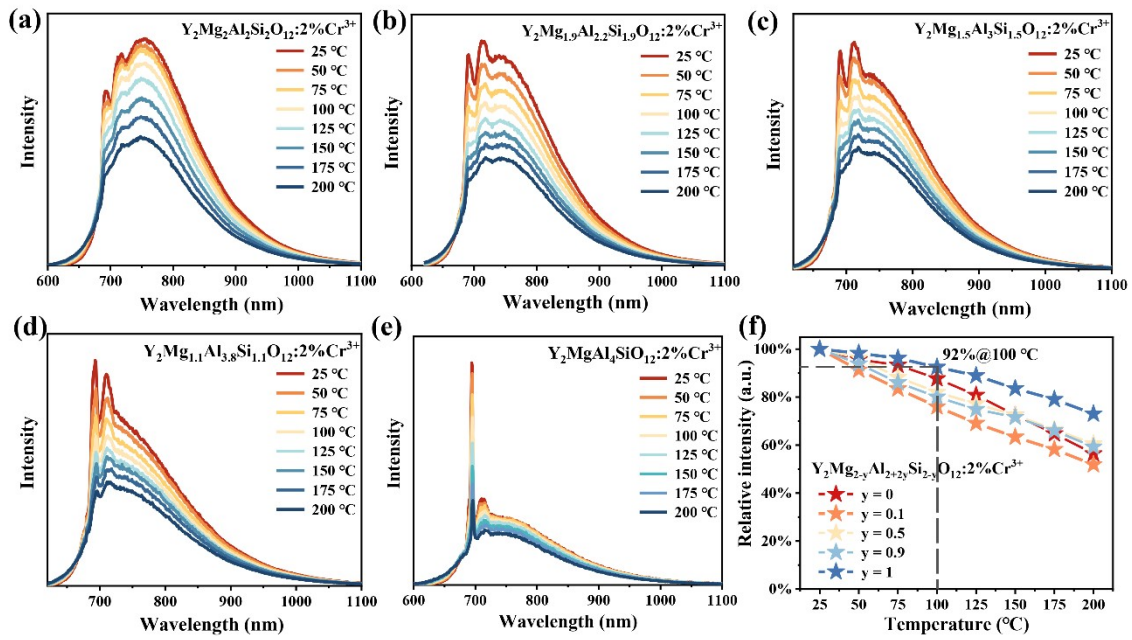

**Fig. S9** Temperature - dependent PL spectra of  $\text{Y}_2\text{Mg}_{2-y}\text{Al}_{2+2y}\text{Si}_{2-y}\text{O}_{12}:2\%\text{Cr}^{3+}$  (a)  $y = 0$ , (b)  $y = 0.1$ , (c)  $y = 0.5$ , (d)  $y = 0.9$  and (e)  $y = 1$ . (f) Temperature-dependent integral intensity of  $\text{Y}_2\text{Mg}_{2-y}\text{Al}_{2+2y}\text{Si}_{2-y}\text{O}_{12}:2\%\text{Cr}^{3+}$  ( $y = 0, 0.1, 0.5, 0.9$  and  $1$ ).

The optical band gap can be calculated using the following Kubelka - Munk formula<sup>[S1, S2]</sup>:

$$F(R) = \frac{(1 - R)^2}{2R} \quad (S1)$$

$$[F(R) \times hv]^{1/n} = A(hv - E_g) \quad (S2)$$

where  $F(R)$  is the absorption,  $R$  is the reflectance,  $hv$  is the photon energy,  $A$  is the absorption constant, and  $E_g$  is the optical band gap. The  $n$  values determined by the directly allowed transition, directly forbidden transition, indirectly allowed transition, and indirectly forbidden transition are 1/2, 3/2, 2, and 3, respectively. The electronic transition of this garnet belongs to directly allowed transition ( $n = 1/2$ ), so the  $E_g$  of YMAS is estimated to be 5.87 eV.

## References

[S1] C. Li, J. Zhong, *Chem. Mater.* **2022**, *34*, 8418.

[S2] T. Gao, W. Zhuang, R. Liu, Y. Liu, X. Chen, Y. Xue, *J. Alloys Compd.* **2020**, *848*, 156557.
